# Supplementary material for: Systemic network analysis identifies XIAP and IκBα as potential drug targets in TRAIL resistant BRAF mutated melanoma
Source: PubMed Central journal article supplement (PMC6218484; doi:10.1038/s41540-018-0075-y), 2018-11-05
Supplement: 41540_2018_75_MOESM1_ESM.pdf [file 41540_2018_75_MOESM1_ESM.pdf]

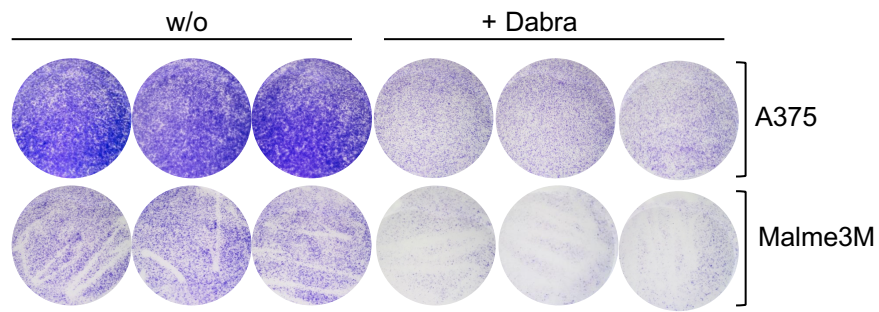

**Figure S1: Clonogenic outgrowth of *mut*BRAF melanoma cells in response to dabrafenib.**  $8.5 \times 10^2$  A375 or  $2 \times 10^4$  Malme3M cells were seeded into 6-well plates and stimulated or not with dabrafenib (Dabra, 10  $\mu$ M) for 8 days. Subsequently, cells were stained with crystal violet. Three independently performed experiments per cell lines are shown.

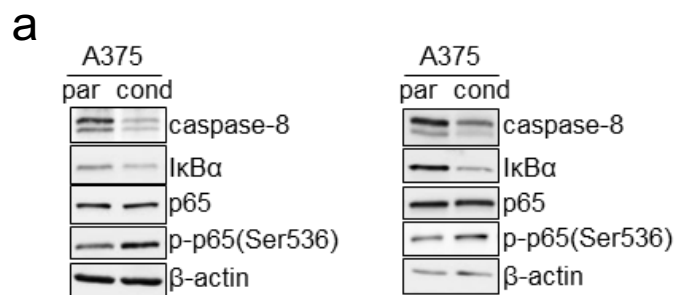

**b**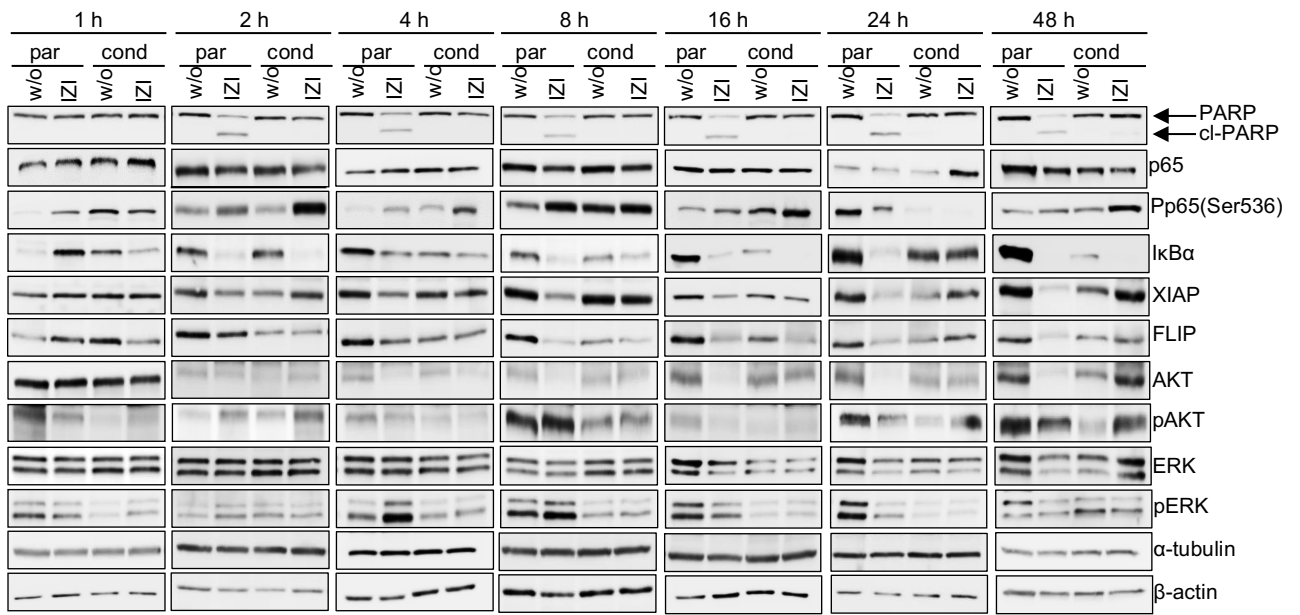**c**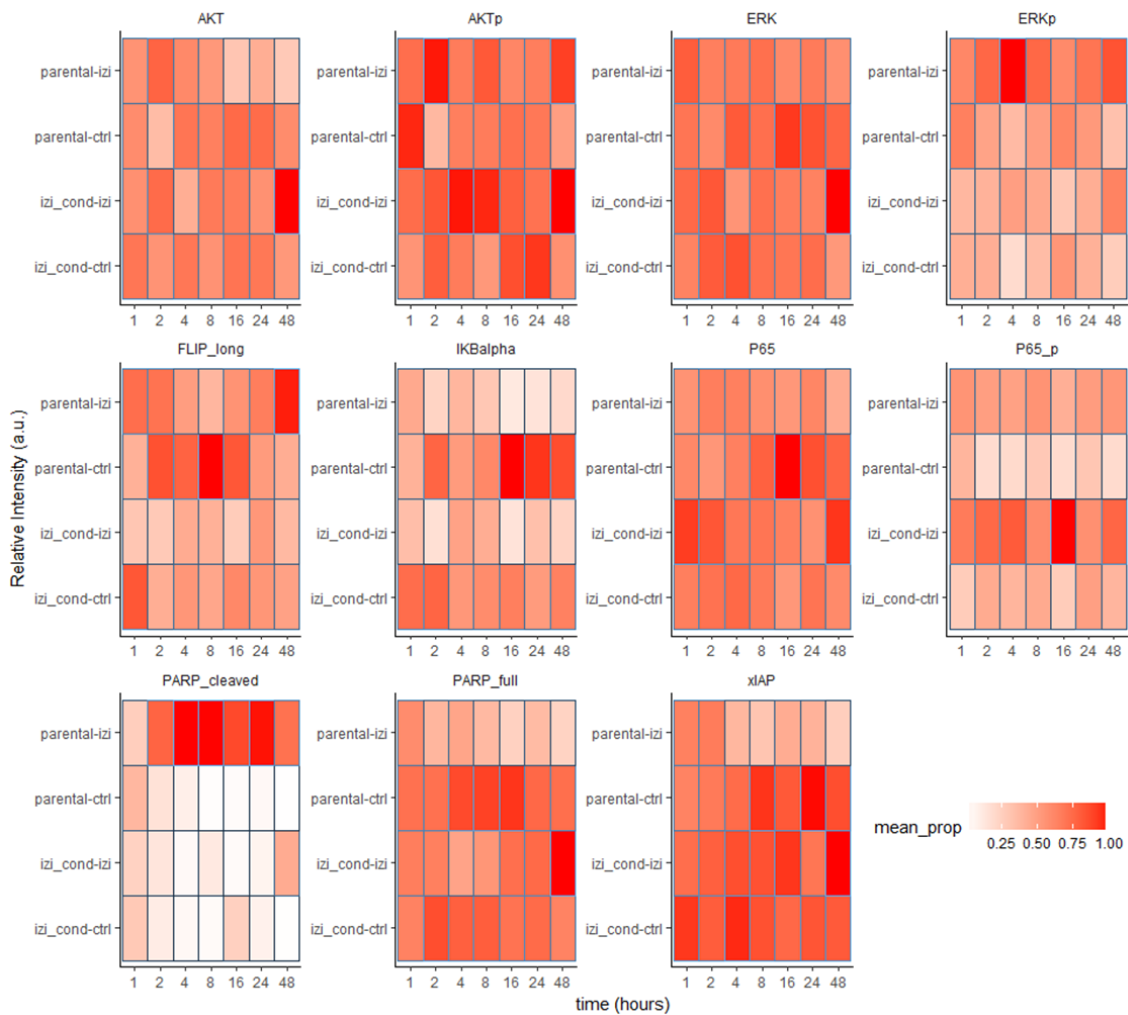

**Figure S2: Protein expression pattern of TRAIL-sensitive parental versus TRAIL-resistant conditioned melanoma cells.** (a) The expression level of caspase-8, I $\kappa$ B $\alpha$ , NF $\kappa$ B(p65) and phosphorylated-p65(Ser536) in untreated parental and IZI-conditioned A375 cells was monitored by Western-blot analysis.  $\beta$ -actin served as loading control (b) Expression and/or activation of PARP, NF $\kappa$ B(p65), pp65(Ser536), I $\kappa$ B $\alpha$ , XIAP, FLIP, AKT, pAKT, ERK, pERK was assessed in *mutBRAF* A375 melanoma cell lines at the indicated time points by Western-blot analysis.  $\alpha$ -tubulin and  $\beta$ -actin served as loading control. One representative out of 5 independently performed experiments is shown. (c) Normalized time course Western-blot data comparing parental and IZI conditioned A375 cells upon IZI1551 treatment. The represented heatmaps show the mean expression of 5 replicates with the highest intensity scaled to 1.

|   | <b>target</b> | <b>dose<br/>[ng/ml]</b> | <b>treatment</b> | <b>scaled_mean<br/>(%apoptosis)</b> | <b>scaled_error</b> |
|---|---------------|-------------------------|------------------|-------------------------------------|---------------------|
| 1 | apoptosis     | 0                       | ctrl             | 5.0                                 | 0                   |
| 2 | apoptosis     | 0.5                     | IZI              | 17.0                                | 2.2                 |
| 3 | apoptosis     | 2                       | IZI              | 25.6                                | 1.1                 |
| 4 | apoptosis     | 4                       | IZI              | 33.9                                | 3.4                 |
| 5 | apoptosis     | 6                       | IZI              | 40.3                                | 1.6                 |
| 6 | apoptosis     | 8                       | IZI              | 41.6                                | 6.6                 |
| 7 | apoptosis     | 10                      | IZI              | 58.6                                | 8.6                 |
| 8 | apoptosis     | 25                      | IZI              | 61.1                                | 5.13                |
| 9 | apoptosis     | 50                      | IZI              | 64.5                                | 6.8                 |

**Table S1: IZI dose response data used for the EC50 calculation.**

| parameter values       |          |             |                |
|------------------------|----------|-------------|----------------|
| reaction               | parental | conditioned | interpretation |
| BCL2- Casp3cl          | 0.013    | 0.013       | equal          |
| Casp3cl->Apoptosis     | 0.500    | 0.501       | equal          |
| Casp3cl- XIAP          | 0.379    | 0.004       | different      |
| Casp8cl- cFLIP         | 0.354    | 0.365       | equal          |
| cFLIP->pAKT            | 0.981    | 0.984       | equal          |
| cFLIP->pIKK            | 0.071    | 0.192       | different      |
| cFLIP->pERK            | 0.736    | 0.736       | equal          |
| cFLIP- Casp8cl         | 0.006    | 0.005       | equal to 0     |
| FADD->pIKK             | 0.921    | 0.795       | different      |
| housekeeper->cFLIP     | 0.679    | 0.680       | equal          |
| housekeeper->pp65      | 0.004    | 0.008       | equal to 0     |
| housekeeper->XIAP      | 0.731    | 0.730       | equal          |
| housekeeper_BRAF->BRAF | 0.022    | 0.021       | equal          |
| IKBalph- pp65          | 0.006    | 0.006       | equal to 0     |
| NRAS->pAKT             | 0.019    | 0.016       | equal          |
| NRAS->BRAF             | 0.978    | 0.979       | equal          |
| pAKT->pIKK             | 0.008    | 0.013       | equal          |
| pAKT->Survival         | 0.012    | 0.020       | equal          |
| pAKT- BRAF             | 0.005    | 0.005       | equal to 0     |
| PARPcl->Apoptosis      | 0.500    | 0.499       | equal          |
| pERK->pp65             | 0.473    | 0.118       | different      |
| pERK->Survival         | 0.963    | 0.954       | equal          |
| pIKK- IKBalph          | 0.850    | 0.859       | equal          |
| pIKK->pp65             | 0.523    | 0.874       | different      |
| pMEK->pERK             | 0.264    | 0.264       | equal          |
| pp65->cFLIP            | 0.321    | 0.320       | equal          |
| pp65->Survival         | 0.025    | 0.026       | equal          |
| pp65->XIAP             | 0.269    | 0.270       | equal          |
| XIAP- Casp3cl          | 0.013    | 0.871       | different      |

**Table S2: Table comparing the optimal parameter values used for model predictions after L1/2 and L1 groups regularization.**
